# Supplementary material
Source: PubMed Central journal article supplement (PMC3612130)

**Supplemental Table 1. Summary of covariate model selection**

| Covariate                                                                       | Model parameter | $\Delta$ OFV | $\Delta$ IIV/ $\Delta$ IOV <sup>a</sup> |
|---------------------------------------------------------------------------------|-----------------|--------------|-----------------------------------------|
| <b>Forward selection</b>                                                        |                 |              |                                         |
| <b>Step 1. Basic model (without any covariate)</b>                              |                 |              |                                         |
| Age (year)                                                                      | CL              | -12.21       | -0.25%                                  |
| Serum albumin (g/dL)                                                            | CL              | -68.79       | -4.75%                                  |
| Serum albumin (g/dL)                                                            | V <sub>c</sub>  | -1.37        | +3.2%                                   |
| Serum albumin (g/dL)                                                            | Q               | -6.20        | +1.6%                                   |
| Serum albumin (g/dL)                                                            | V <sub>p</sub>  | -0.10        | -2.4%                                   |
| Serum total bilirubin (μmol/L)                                                  | CL              | -30.75       | -6.65%                                  |
| Serum direct bilirubin (μmol/L)                                                 | CL              | -31.34       | -2.36%                                  |
| Serum creatinine (mg/dL)                                                        | CL              | -14.32       | -0.14%                                  |
| Serum aspartate aminotransferase (U/L)                                          | CL              | -2.08        | -0.14%                                  |
| Serum alanine aminotransferase (U/L)                                            | CL              | -2.73        | -0.14%                                  |
| Serum alkaline phosphatase (U/L)                                                | CL              | -12.50       | -0.54%                                  |
| Serum lactate dehydrogenase (U/L)                                               | CL              | -3.99        | -0.14%                                  |
| Fludarabine administration                                                      | CL              | -0.64        | 0%                                      |
| Fludarabine administration                                                      | K <sub>a</sub>  | -16.63       | -3.23% / +3.04%                         |
| Gender                                                                          | CL              | +0.11        | 0%                                      |
| Cyclosporine administration                                                     | CL              | -46.02       | -3.09%                                  |
| Conditioning regimen (myeloablative vs. nonmyeloablative)                       | CL              | -20.42       | -0.41%                                  |
| Conditioning regimen                                                            | K <sub>a</sub>  | -8.82        | -15.77%                                 |
| Donor type                                                                      | CL              | -2.38        | 0%                                      |
| Donor type                                                                      | K <sub>a</sub>  | -8.71        | +0.51%                                  |
| <b>Step 2. Intermediate model (albumin as covariate to CL)</b>                  |                 |              |                                         |
| Age (year)                                                                      | CL              | -12.91       | -0.33% / +0.07%                         |
| Serum total bilirubin (μmol/L)                                                  | CL              | -18.29       | -0.80% / -0.32%                         |
| Serum direct bilirubin (μmol/L)                                                 | CL              | -16.70       | -1.10% / -0.20%                         |
| Serum creatinine (mg/dL)                                                        | CL              | -10.93       | -0.20% / -0.20%                         |
| Serum alkaline phosphatase (U/L)                                                | CL              | -6.60        | -0.10%/-0.06%                           |
| Fludarabine administration                                                      | K <sub>a</sub>  | -10.06       | -1.71% /+0.6%                           |
| Cyclosporine administration                                                     | CL              | -50.11       | -3.04%/-0.03%                           |
| Conditioning regimen                                                            | CL              | -9.52        | +0.25% / +0.01%                         |
| Conditioning regimen                                                            | K <sub>a</sub>  | -7.01        | -3.06% / +1.09%                         |
| <b>Step 3. Intermediate model (albumin and cyclosporine as covariate to CL)</b> |                 |              |                                         |
| Serum total bilirubin (μmol/L)                                                  | CL              | -4.40        | +0.02% / -0.25%                         |
| Serum direct bilirubin (μmol/L)                                                 | CL              | -2.41        | -0.07% / -0.14%                         |
| Fludarabine administration                                                      | K <sub>a</sub>  | +40.40       | +2.25% /+0.6%                           |
| Conditioning regimen                                                            | K <sub>a</sub>  | +43.13       | +0.92% /+1.1%                           |
| <b>Backward elimination</b>                                                     |                 |              |                                         |
| <b>Step 4. Intermediate model (albumin and cyclosporine as covariate to CL)</b> |                 |              |                                         |
| Serum albumin (g/dL)                                                            | CL              | +50.14       | +3.03% / +0.03%                         |
| Cyclosporine administration                                                     | CL              | +64.94       | +4.18% / -0.8%                          |

<sup>a</sup>Change in the objective function value (OFV) was compared to the base structural model (Figure 1). The final covariate model incorporated albumin and cyclosporine as covariates to MPA clearance (CL). K<sub>a</sub>: first-order rate constant representing both formation and

---

absorption process;  $V_c$ : volume of central compartment; IIV: inter-individual variability; IOV: Inter-occasion variability. Due to extensive running time, FO method was used for covariate model exploration (step 1). FOCE method was used for model validation (step 2 to step 4).

**Supplemental Table 2. Five-sample LSS of 4 hr duration sampling after oral MMF administration**

| Q12 hr oral MMF dosing            |                             |      |      |      |     |
|-----------------------------------|-----------------------------|------|------|------|-----|
| RMSE<br>(AUC <sub>0-12hr</sub> )% | Proposed Sampling Time (hr) |      |      |      |     |
|                                   | #1                          | #2   | #3   | #4   | #5  |
| 16.24                             | -0.1                        | 0.25 | 1.25 | 2    | 4   |
| 16.30                             | -0.1                        | 0.25 | 1.25 | 2    | 3   |
| 16.30                             | -0.1                        | 0.25 | 1    | 2    | 4   |
| 16.30                             | -0.1                        | 0.25 | 1.25 | 3    | 4   |
| 16.32                             | -0.1                        | 0.25 | 0.5  | 2    | 4   |
| 16.34                             | -0.1                        | 0.25 | 0.5  | 3    | 4   |
| 16.35                             | -0.1                        | 0.25 | 1    | 3    | 4   |
| 16.39                             | -0.1                        | 0.25 | 1    | 2    | 3   |
| 16.40                             | -0.1                        | 0.25 | 1    | 1.25 | 4   |
| 16.40                             | -0.1                        | 0.25 | 1.25 | 2.5  | 4   |
| Q8 hr oral MMF dosing             |                             |      |      |      |     |
| RMSE<br>(AUC <sub>0-8hr</sub> )%  | Proposed Sampling Time (hr) |      |      |      |     |
|                                   | #1                          | #2   | #3   | #4   | #5  |
| 16.59                             | -0.1                        | 0.25 | 1.25 | 2    | 3   |
| 16.61                             | -0.1                        | 0.25 | 1    | 1.25 | 3   |
| 16.64                             | -0.1                        | 0.25 | 1    | 1.25 | 4   |
| 16.68                             | -0.1                        | 0.25 | 1.25 | 2    | 2.5 |
| 16.69                             | -0.1                        | 0.25 | 1    | 2    | 3   |
| 16.69                             | -0.1                        | 0.25 | 0.5  | 1.25 | 3   |
| 16.69                             | -0.1                        | 0.25 | 1    | 1.25 | 2   |
| 16.69                             | -0.1                        | 0.25 | 1.25 | 2    | 4   |
| 16.71                             | -0.1                        | 0.25 | 1    | 2    | 2.5 |
| 16.72                             | -0.1                        | 0.25 | 0.5  | 2    | 3   |

**Supplemental Figure 1.** Representative individual MPA concentration-time profiles.

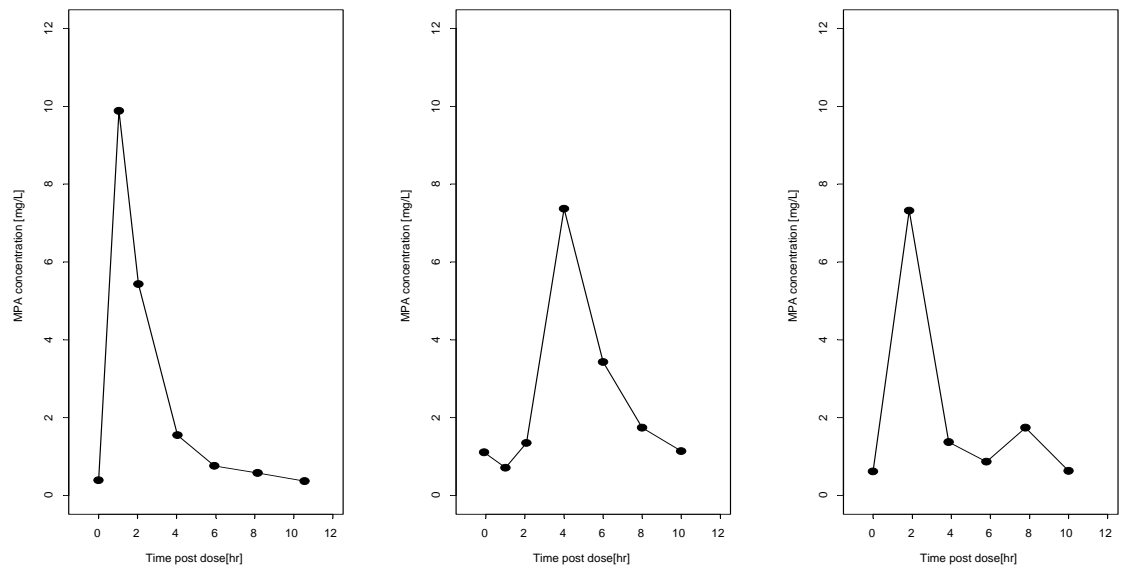

**Supplemental Figure 2.** Individual Bayesian estimates of clearance from the base structural model as a function of albumin concentration (left panel) and concomitant calcineurin inhibitor (right panel). Solid line in the left panel is the regression line.

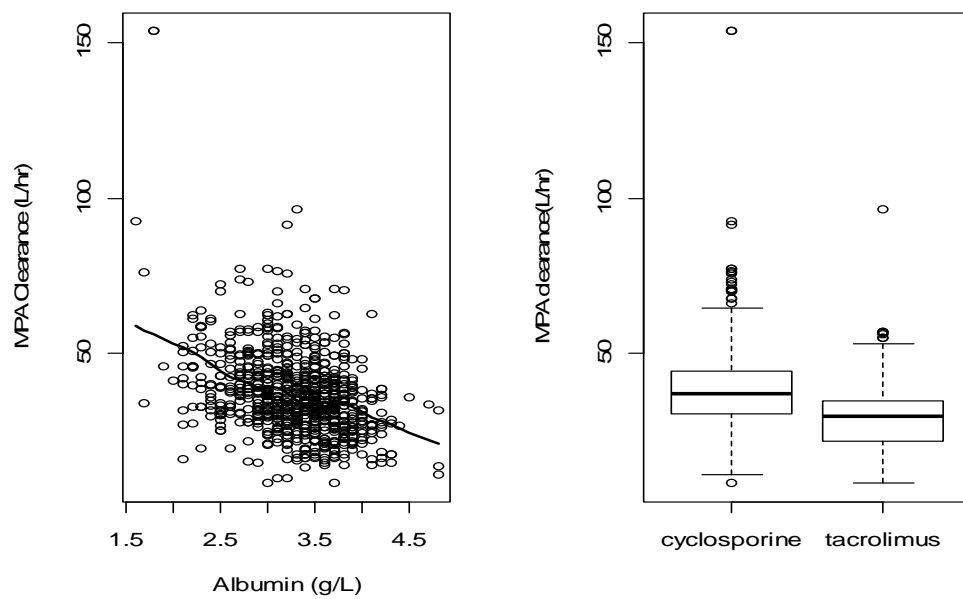

**Supplemental Figure 3.** Goodness-of-fit plots. Upper left panel: Observed vs. population predicted MPA concentrations. Upper right panel: Observed vs. and individual predicted MPA concentrations. Lower left panel: weighted residuals vs. population predicted MPA concentrations. Lower right panel: weighted residuals vs. time after MMF dose. Solid lines in the upper panels represent lines of identity; solid lines in the lower panels represent WRSE = 0.

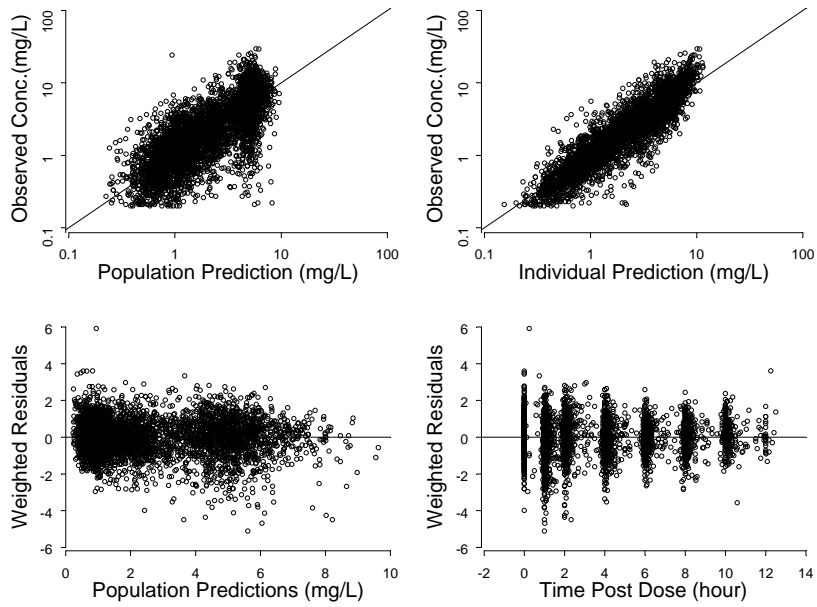

**Supplemental Figure 4.** Precision of various pharmacokinetic sampling schedules to predict the actual AUC for oral MMF administered every 12 hr (top panel) and every 8 hr (bottom panel).

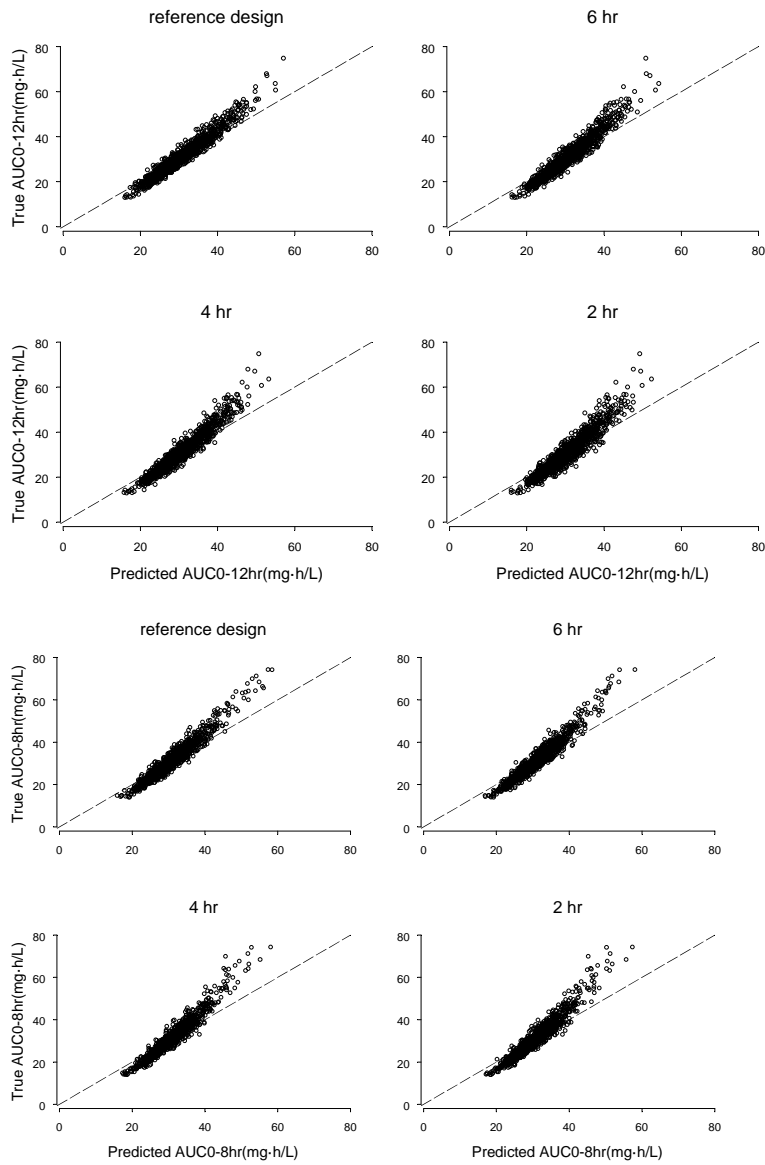

**Supplemental Figure 5.** Maximum a posteriori Bayesian estimates of total MPA AUC by covariates for Q12hr (top panel) and Q8hr (bottom panel) oral MMF dosing. Data presented by quartiles of albumin concentration. Solid and open circles represent patients receiving tacrolimus and cyclosporine, respectively.

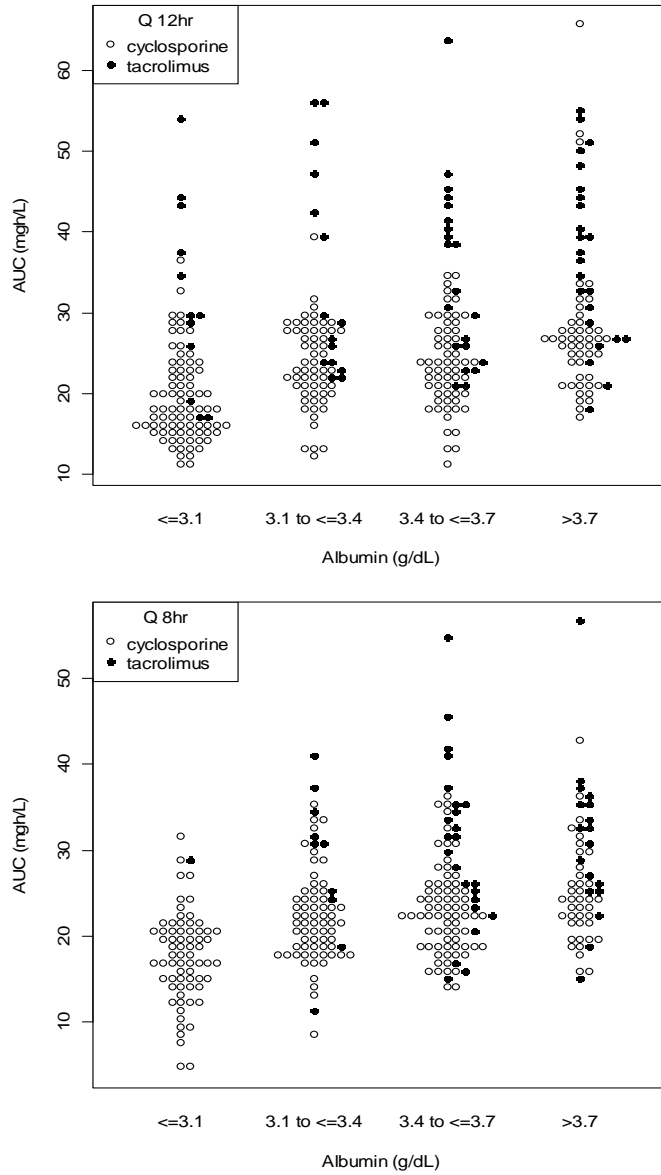



**Supplemental Figure 6.** Simulated total MPA C<sub>ss</sub> (μg/mL) values in subjects weighing less than 50 kg and serum albumin concentration of 3.4 g/dL for oral administration of MMF every 8 hr at 1250 mg, 1750 mg, 15 mg/kg, and 20 mg/kg with a calcineurin inhibitor, either cyclosporine and tacrolimus. Dashed line represents the lower therapeutic C<sub>ss</sub> of 3 μg/mL.

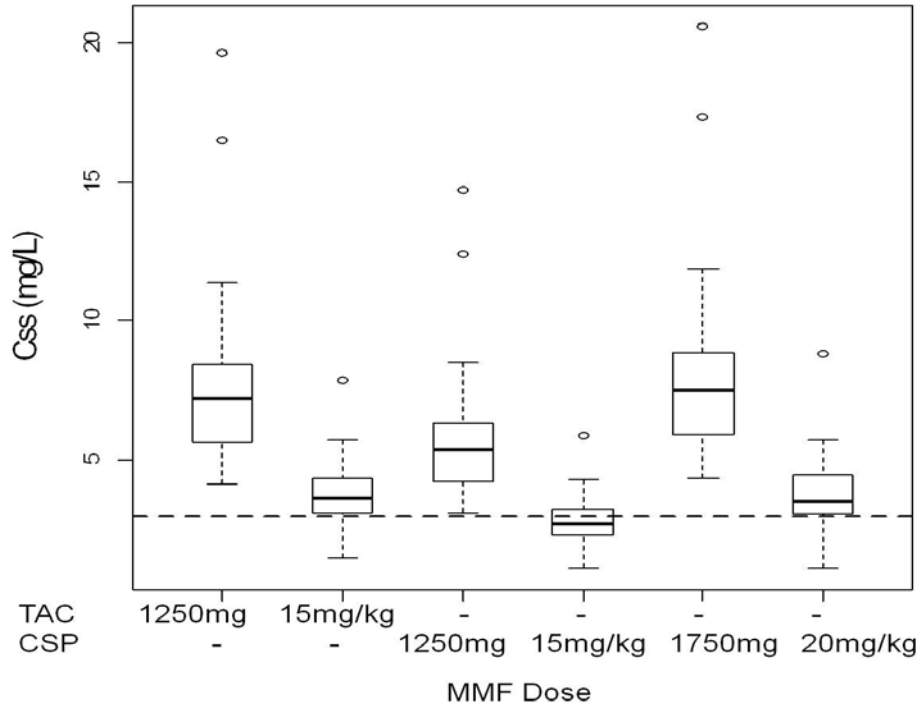

Supplement: NIHMS423270-supplement-supplement_1.pdf [file NIHMS423270-supplement-supplement_1.pdf]
